# Supplementary material for: Effects of a galacto-oligosaccharide-rich diet on fecal microbiota and metabolite profiles in mice
Source: Royal Society of Chemistry journal article supplement (doi:10.1039/c7fo01720k), 2018-01-01
Supplement: c7fo01720k3.pdf [file c7fo01720k3.pdf]

## Supplementary Material

**Figure S1** Dietary intake during the entire experimental phase.

**Figure S2** Changes in the abundance of selected genera.

**Table S1** Changes in body weight during the entire experimental phase.

**Table S2** Differentially expressed metabolites.

**Table S3** Enriched KEGG pathways in the GOS-fed group compared to the control.

**Table S4** Prediction of differences in the metagenome functional content between GOS-fed and control mice using PICRUSt.
