# Supplementary material for: Effects of a galacto-oligosaccharide-rich diet on fecal microbiota and metabolite profiles in mice
Source: Royal Society of Chemistry journal article supplement (doi:10.1039/c7fo01720k), 2018-01-01
Supplement: c7fo01720k4.xlsx [file c7fo01720k4.xlsx]

## Sheet: Sheet1
WEEKS	CTRL1	CTRL2	CTRL3	CTRL4	CTRL5	CTRL6	GOS1	GOS2	GOS3	GOS4	GOS5	GOS6
0	24.9g	25.3g	25.1g	25.4g	25.2g	25.5g	25.5g	25.3g	25.1g	25.2g	24.9g	25.3g
1	25.2g	25.2g	25.6g	25.8g	25.7g	25g	25.3g	26.1g	25.1g	25.6g	24.5g	25.9g
2	25.2g	25.7g	25.3g	25.4g	26.1g	25.5g	25.6g	25.3g	24.5g	26.8g	25.2g	25.3g
3	24.9g	25.3g	24.5g	26.2g	26.3g	25.6g	25.5g	26.3g	25.1g	25.7g	26.1g	26.4g
