# Supplementary material for: Effects of a galacto-oligosaccharide-rich diet on fecal microbiota and metabolite profiles in mice
Source: Royal Society of Chemistry journal article supplement (doi:10.1039/c7fo01720k), 2018-01-01
Supplement: c7fo01720k5.xlsx [file c7fo01720k5.xlsx]

## Sheet: file explanation
Name	Description
id	Unique number
Peak	Compound name
Similarity	The degree of similarity between the compound and the compound in the standard library
rt	Chromatography retention time
Mass	Mass-to-charge ratio
VIP	Variable importance in the projection
	VIP>1 and P-value<0.05

## Sheet: GOS-CTRL
id	Peak	Similarity	rt	Mass	MEAN GOS	MEAN CTRL	VIP	P-VALUE	Q-VALUE	FOLD CHANGE	LOG_FOLDCHANGE
189	proline	914	9.68103,0	142	0.527154	0.128574	1.8688	0.000802045	0.00797752	4.1	2.03562
439	tyrosine 1	909	16.0103,0	218	0.705011	0.339036	1.43508	0.00467082	0.0127697	2.07946	1.05621
195	succinic acid	903	9.86522,0	147	1.93299	0.164077	1.81028	0.0129038	0.0212451	11.781	3.55839
257	L-Malic acid	862	11.7521,0	233	0.00833211	0.000166627	1.79557	0.0147642	0.0226498	50.0045	5.64399
384	3,6-Anhydro-D-galactose 4	850	14.6757,0	199	0.0384081	0.000146699	1.10863	0.0331698	0.0339361	261.817	8.03241
431	lysine	843	15.8695,0	174	0.641816	0.179652	1.64976	0.000642224	0.00780235	3.57255	1.83695
77	Maleimide	839	7.39144,0	154	0.0257006	0.00864686	1.53781	0.00950203	0.0186461	2.97225	1.57155
458	pantothenic acid	836	16.4226,0	291	0.0152319	0.00129112	1.14107	0.0112171	0.0200701	11.7974	3.5604
482	N-Acetyl-D-galactosamine 1	834	17.11,0	202	0.0953456	0.0189561	1.25735	0.0242339	0.0286778	5.02982	2.33051
268	aspartic acid 1	825	12.0996,0	232	0.0785229	0.00899178	1.0464	0.0174071	0.0244197	8.73274	3.12644
464	xanthine	824	16.6519,0	353	0.0851202	0.00657033	1.41222	0.00262618	0.0091941	12.9552	3.69546
507	heptadecanoic acid	811	17.6583,0	132	0.047405	0.0049531	1.04132	0.0017987	0.00845138	9.57077	3.25864
483	myo-inositol	795	17.2102,0	305	0.0460287	0.00469813	1.03328	0.00273006	0.00933443	9.79725	3.29238
275	4-aminobutyric acid 1	771	12.2263,0	174	0.0451868	0.00371576	1.29485	0.0165451	0.0238766	12.1609	3.60417
445	pentadecanoic acid	716	16.0939,0	132	0.0500879	0.00884326	1.46368	0.000557759	0.00773313	5.66396	2.50181
687	Lignoceric acid	690	22.2567,0	132	0.0611477	0.00676042	1.76356	0.0230905	0.0279335	9.04496	3.17711
287	L-cysteine	685	12.4697,0	220	0.00790339	0.000993467	1.17719	0.00773228	0.016872	7.95536	2.99193
448	1-Hexadecanol	668	16.1958,0	299	0.00545444	0.00095608	1.09489	0.0124728	0.0209631	5.705	2.51223
438	D-galacturonic acid 1	653	15.9682,0	333	0.0054342	0.000137306	1.00203	0.0393122	0.0368023	39.5774	5.3066
526	Fructose 2,6-biphosphate degr prod 2	639	18.1257,0	342	0.118296	0.00229185	1.32021	0.00322426	0.0101209	51.6161	5.68975
511	Octadecanol	598	17.7449,0	327	0.00334554	0.000489331	1.49945	0.00135837	0.00832242	6.83696	2.77335
459	gluconic acid 1	594	16.4668,0	333	0.00401964	4.20267e-05	1.82264	0.0125933	0.0210431	95.645	6.57962
236	2-Deoxytetronic acid	561	11.1471,0	233	0.00151639	0.000505604	1.25503	0.00325402	0.0101657	2.99917	1.58456
245	Erythrose 1	548	11.3627,0	205	0.00184526	9.82693e-09	1.99727	0.000389035	0.00751333	187776	17.5187
239	L-Threose 1	492	11.2266,0	117	0.0226283	0.00466613	1.09545	0.00278235	0.00940263	4.84949	2.27783
460	Galactonic acid	466	16.4685,0	212	0.0316111	0.00031149	1.07294	0.037951	0.03621	101.484	6.6651
348	Levoglucosan	445	13.9805,0	129	0.032348	9.82693e-09	1.64903	0.0121995	0.0207781	3.29177e+06	21.6504
259	5,6-dihydrouracil 1	432	11.8131,0	243	0.0032981	9.82693e-09	1.63867	0.00792923	0.0170799	335618	18.3565
303	Digitoxose 1	402	12.844,0	103	0.00663366	9.82693e-09	1.64343	0.0289482	0.0316365	675049	19.3646
135	succinate semialdehyde 1	395	8.39642,0	168	0.00109581	9.82693e-09	1.62461	0.0194356	0.0255853	111510	16.7668
718	21-hydroxypregnenolone 2	374	23.5309,0	132	0.00343297	9.82693e-09	1.63203	0.0126551	0.0210838	349343	18.4143
242	2,4-diaminobutyric acid 3	302	11.3135,0	174	0.0134206	0.000144174	1.78396	0.00789881	0.0170481	93.0867	6.5405
662	Monoolein	299	21.6746,0	132	0.027492	0.00138114	1.36915	0.015548	0.0232083	19.9052	4.31508
405	4-aminobenzoic acid	283	15.1404,0	174	0.0175704	0.00110703	1.36531	0.0306272	0.0325877	15.8717	3.98838
402	N(alpha),N(alpha)-dimethyl-L-histidine	274	15.082,0	87	0.0126355	9.82693e-09	1.63235	0.0131755	0.021417	1.28581e+06	20.2942
234	Biuret 3	272	11.1184,0	258	0.0025985	9.82693e-09	1.9971	0.00204778	0.00850081	264427	18.0125
230	3-methylcatechol	243	10.9552,0	270	0.00539743	9.82693e-09	1.99518	0.00692148	0.0159559	549249	19.0671
320	Fluorene	243	13.3092,0	316	0.000726479	9.82693e-09	1.30377	0.0359276	0.0352862	73927.3	16.1738
324	xylose 1	930	13.4162,0	234	0.000576488	0.033133	1.44099	0.0202194	0.0259981	0.0173992	-5.84483
187	Isoleucine	912	9.60558,0	158	0.115784	0.526277	1.73367	0.00900734	0.0181827	0.220006	-2.18439
530	oleic acid	902	18.2181,0	339	0.0182093	0.110592	1.24926	0.00138024	0.00833065	0.164652	-2.60251
355	fucose 1	869	14.0803,0	117	0.0119308	0.203226	1.38934	0.0166153	0.023922	0.0587071	-4.09032
593	Arachidic acid	799	19.783,0	132	3.39025e-09	0.0324084	1.99783	0.00743561	0.0165484	1.0461e-07	-23.1885
528	linoleic acid	794	18.1777,0	337	0.0402781	0.118042	1.70434	0.0125799	0.0210343	0.341219	-1.55123
407	Tagatose 1	732	15.174,0	307	3.39025e-09	0.000668402	1.49877	0.0353904	0.0350318	5.07218e-06	-17.589
421	adenine	730	15.4451,0	264	3.39025e-09	0.00904053	1.50142	0.0344329	0.0345682	3.75006e-07	-21.3466
644	Behenic acid	724	21.0632,0	132	0.00177543	0.0139435	1.71201	0.00416264	0.0118791	0.12733	-2.97335
359	3-(3-hydroxyphenyl)propionic acid	723	14.1898,0	205	0.00291727	0.0480015	1.76322	0.0116793	0.0204119	0.0607745	-4.04039
487	ferulic acid	661	17.288,0	338	3.39025e-09	0.0096989	1.52408	0.0475157	0.0409046	3.4955e-07	-21.448
501	Analyte 577	642	17.5448,0	319	3.39025e-09	0.00764683	1.52422	0.0374691	0.0359948	4.43354e-07	-21.105
372	3-(4-hydroxyphenyl)propionic acid	630	14.4959,0	179	0.000902901	0.00549854	1.38345	0.0153524	0.0230718	0.164207	-2.60641
654	cellobiose 1	579	21.4534,0	160	3.39025e-09	9.82693e-09	1.7784	0.00219054	0.00852427	0.344996	-1.53535
632	1-Monopalmitin	554	20.702,0	371	0.000235495	0.00979209	1.76282	0.00484792	0.0130627	0.0240496	-5.37785
693	melibiose 2	544	22.4772,0	187	3.39025e-09	9.82693e-09	1.7784	0.00219054	0.00852427	0.344996	-1.53535
592	cytidine-monophosphate degr prod	435	19.7672,0	157	0.0687002	0.109348	1.28351	0.049539	0.0420068	0.628271	-0.670541
704	Galactinol 3	433	22.8299,0	217	0.000335895	0.00880717	1.15094	0.0311393	0.0328678	0.0381388	-4.7126
481	N-Acetyl-beta-D-mannosamine 1	425	17.0975,0	56	0.000898751	0.012971	1.34542	0.0379149	0.036194	0.0692892	-3.85123
658	Turanose 1	308	21.6141,0	436	3.39025e-09	9.82693e-09	1.7784	0.00219054	0.00852427	0.344996	-1.53535
469	Glucosaminic acid	258	16.7527,0	239	3.39025e-09	9.82693e-09	1.7784	0.00219054	0.00852427	0.344996	-1.53535
