# Supplementary figures and images for: Effects of a galacto-oligosaccharide-rich diet on fecal microbiota and metabolite profiles in mice
Source: Royal Society of Chemistry journal article supplement (doi:10.1039/c7fo01720k), 2018-01-01

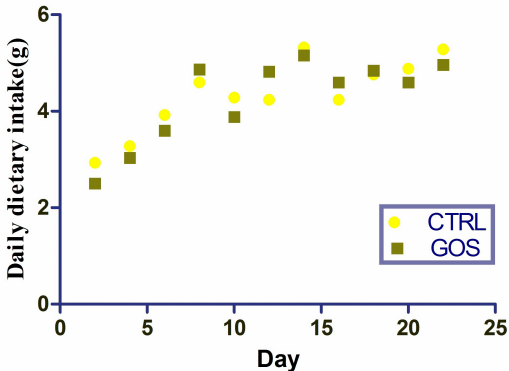

Supplement: c7fo01720k1.pdf [file c7fo01720k1.pdf]

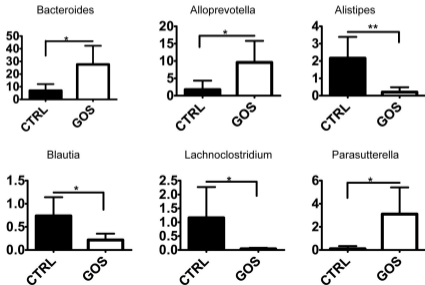

Supplement: c7fo01720k2.pdf [file c7fo01720k2.pdf]
